# Supplementary material for: An in vivo brain–bacteria interface: the developing brain as a key regulator of innate immunity
Source: PubMed Central journal article supplement (PMC7000827; doi:10.1038/s41536-020-0087-2), 2020-02-04
Supplement: 41536_2020_87_MOESM1_ESM.pdf [file 41536_2020_87_MOESM1_ESM.pdf]

## Supplementary Figures

Supplementary Figure S1. Brain Removal, Spinal-Cord resection, Simvastatin-treated and Neural-Crest ablation

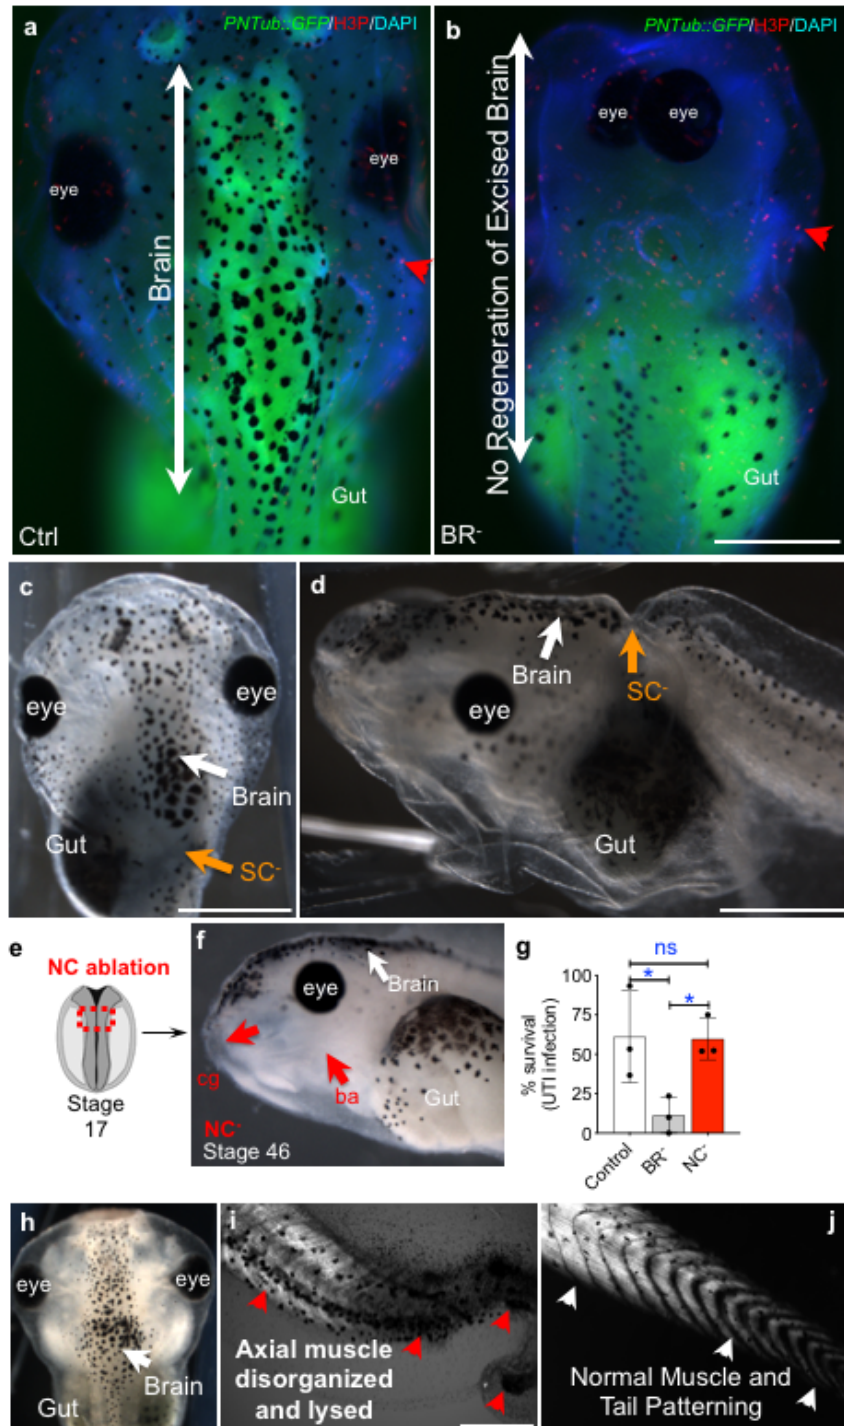

**a,b.** Photomicrographs of Control (Ctrl, **a**) and Brainless (BR<sup>-</sup>, **b**) stage-48 embryos from the transgenic line *PNTub::GFP*. To reveal potential differences in proliferative cells at the face region, we performed immunofluorescence on these embryos against the

Histone H3 phosphorylated at serine 10 (H3P, red dots pointed by red arrow), a mitosis marker extensively used in *Xenopus*. Our results in PNTub::GFP brainless embryos show no growth of GFP-labeled tissue at the brain area, indicating absence of brain regeneration after the complete removal (compare white arrows in a indicating the brain and its extension vs. b with no regenerated tissue along the place where the brain should be). These embryos do not display changes in H3P-positive cells at this face area ( $157 \pm 39$  for Ctrl and  $168 \pm 32$  for BR<sup>-</sup>; unpaired *t*-test  $P=0.76$ ), suggesting there is no difference in the proliferative response targeted to regenerate the brain. **c, d.** Dorsal (c) and lateral (d) views of a late-staged embryo after resection of a constant portion of spinal cord (SC), cervical levels, at stage 25. Orange arrows point the place for surgery removal, showing complete discontinuity between brain and spinal cord. **e-g.** Neural Crest (NC) ablation assays performed on stage-17 embryos (e, red-dashed square indicates the removed NC domain) and the subsequent aberrant phenotype for the craniofacial elements (f), as defects in branchial arcs (ba) or cement gland (cg). **g.** Survival rates of Ctrl, BR<sup>-</sup> and NC<sup>-</sup> infected embryos. Data represent the mean and S.D. of three independent replicates (n=40, N=120). Each replicate is shown by one dot. One-way ANOVA  $P < 0.05$ . Significant *P* values after Bonferroni post-hoc test are indicated as \* $P < 0.05$ , ns  $P > 0.05$ . **h-j.** Dorsal (h) and lateral (i) views of a late-staged embryo after treatment with 0.4  $\mu$ M Simvastatin for 18 hours, showing severe muscle and tail phenotype (red arrows) but normal brain morphology (white arrow). Photomicrographs after polarized light of the posterior region of the tail in an intact or control (j). a-c, h: rostral is up. d, f, i, j: rostral is left, dorsal is up. Eyes, gut, and branchial arches (ba) are indicated for reference.

Supplementary Figure S2. The number and distribution of primitive myeloid precursors (*spiba*<sup>+</sup>) is not altered by presence/absence of a brain during development, with or without infection.

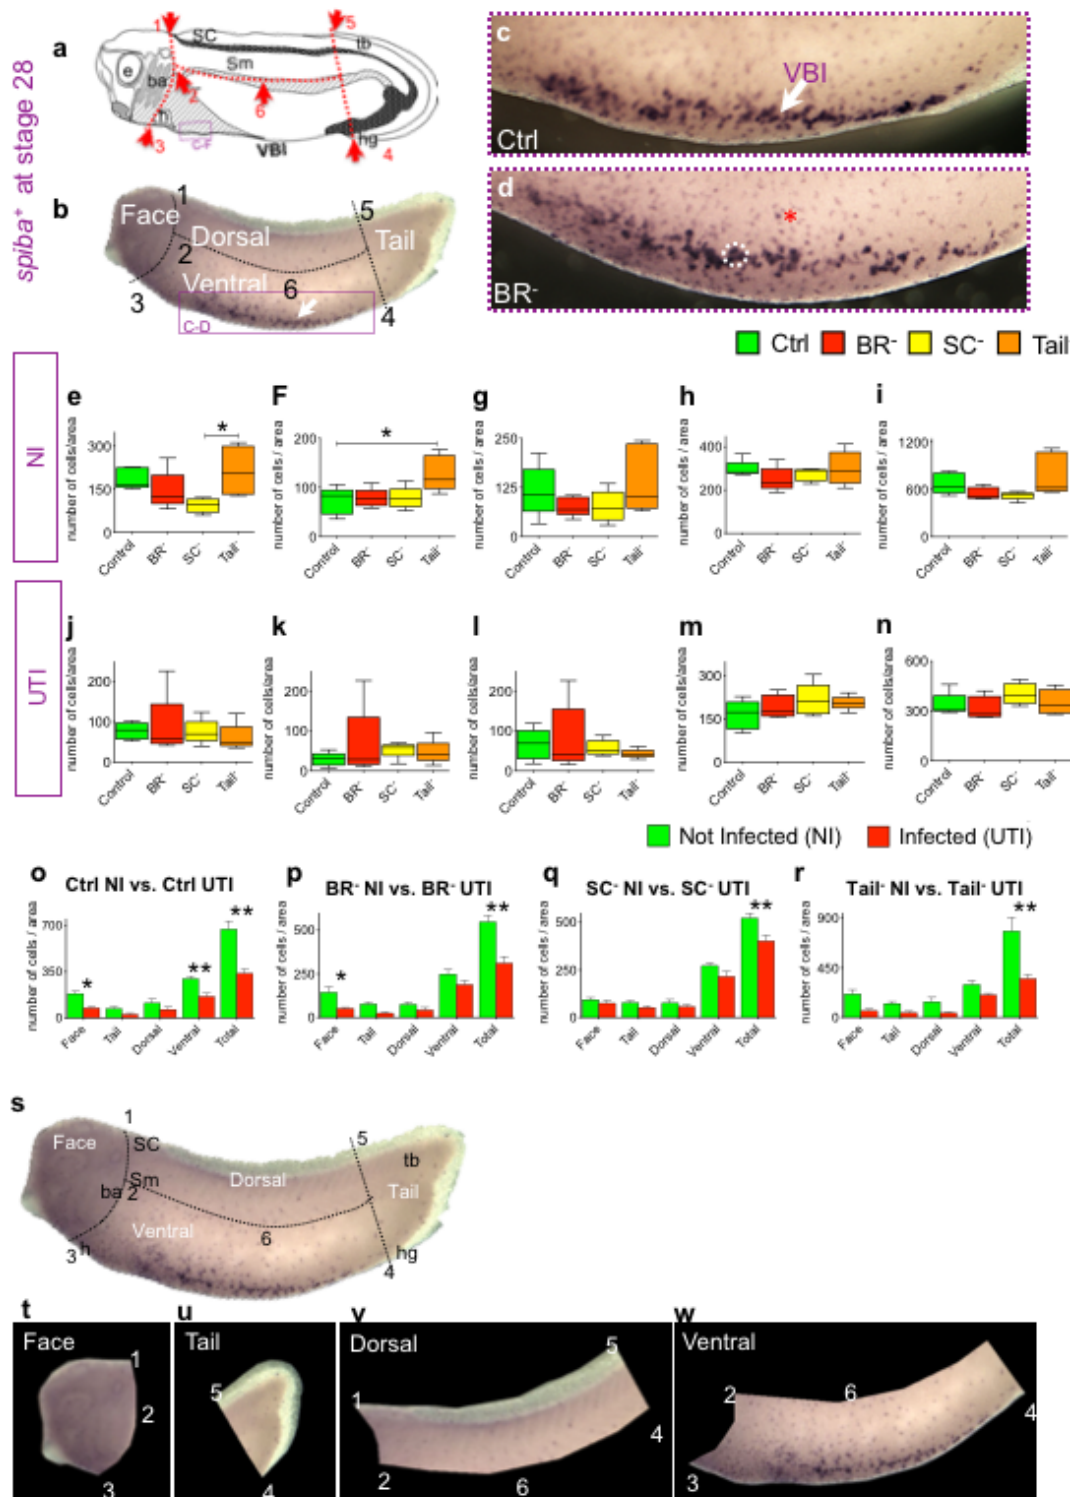

**a, b.** Drawing of (a) and image after *in situ* hybridization (ISH) for *spiba*<sup>+</sup> (b) of one st. 28 *Xenopus* embryo indicating the landmarks (1-6) for the body subdivision in the four

independent areas for quantification. Dashed-purple line square in b indicates the area shown in c&d images. e:eye, ba: branchial archs, SC: spinal cord, Sm: Somite region, tb:tail bud, hg: hind gut and anus. VBI: Ventral Blood Islands or primitive hematopoietic organ. **c, d.** Lateral view of ventral region of representative images for Control (Ctrl, c) and Brainless ( $BR^{-}$ , d) embryos, after *spiba* ISH. White arrow in c points VBI (same place than white arrow in b). In d, red asterisk indicates one single cells vs. white dashed-line rounding cells clumped together. Rostral is left, dorsal is up. **e-n.** Quantification of number of *spiba*<sup>+</sup> cells in not-infected (NI, e-i) and infected (UTI, j-n), belonging each experimental group: Ctrl (green),  $BR^{-}$  (red), spinal cord resection ( $SC^{-}$ ; yellow) and Tailless ( $Tail^{-}$ ; orange). Values for normalized number of *mmp7*<sup>+</sup> cells are plotted per each region and group: face (e,j), tail (f,k), dorsal (g,l) and ventral (h, m). Total (i,n) is the sum of the four regions. One-way ANOVA *P* value showed significance for e and f ( $P<0.05$ ). **o-r.** Number of *spiba*-positive cells (normalized to the area) in NI (green) vs. UTI (red) embryos belonging Ctrl (o),  $BR^{-}$  (p),  $SC^{-}$  (q), and  $Tail^{-}$  (r) groups. Data represent the mean and S.D. of three independent replicates Two-way ANOVA showed significant  $P<0.05$  for all comparisons. Significant *P* values after post-hoc Bonferroni comparisons are indicated as \* $P<0.05$ , \*\* $P<0.01$ . **s-w.** Areas for *spiba* and *mmp7* quantification. Stage-28 embryo after ISH against *spiba* probe (s). Cell counts were performed on four independent and not-overlapping regions: face (t), tail (u), dorsal (v) and ventral (w) defined by six landmarks 1. Beginning of SC, cervical level; 2. Intersection between posterior edge of the ba and ventral edge for the first and most anterior Sm; 3. Anterior to the h; 4. End of hg; 5. Beginning of the tb; 6. ventral line formed by somites.

Supplementary Figure S3. Number and distribution of myeloid precursors (*xlurp*<sup>+</sup>) respect to peripheral nerve network (Tub<sup>+</sup> fibers) in Control (Ctrl), Brainless (BR<sup>-</sup>), Spinal-Cord resection (SC<sup>-</sup>) and Tailless (Tail<sup>-</sup>) embryos.

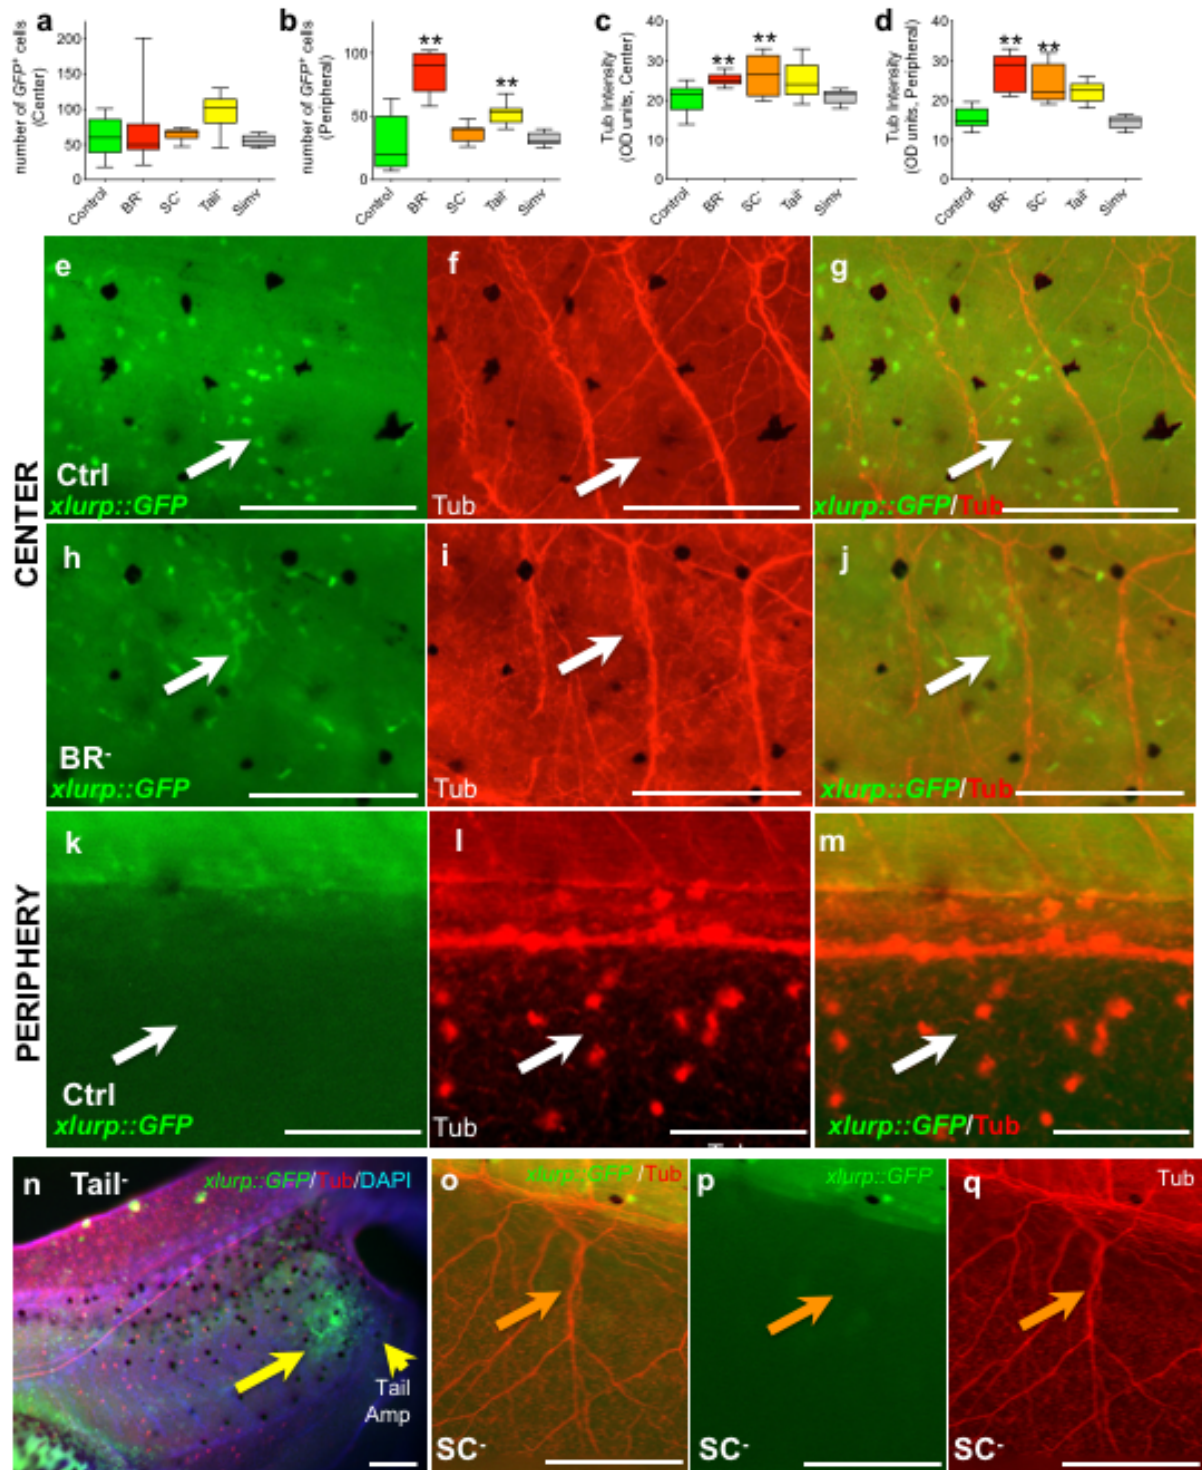

**a–d.** Number of GFP<sup>+</sup> cells (normalized to the area; a,b) and peripheral nerve intensity (measured as Tub OD; c, d) for st. 48 *xlurp::GFP* Control, BR<sup>-</sup>, SC<sup>-</sup>, Tail<sup>-</sup> and

Simv groups.  $P < 0.01$  for Kruskal-Wallis test.  $P$  values after post-hoc Dunn test, when compared to Ctrl group, is indicated as \*\*  $P < 0.01$ . Data represent the mean and S.D. of, at least, ten embryos from three independent replicates. **e–m.** High-magnification images of center (e–j) and peripheral (k–m) tail areas in Control (e–g, k–m) and  $BR^-$  (h–j) *xlurp::GFP* embryos. Left column shows  $GFP^+$  myeloid cells, middle column shows neural network in red and right column shows co-location of immune cells and nerves. White arrows indicate positive elements at the same point on the three images of a row. **n–q.** Low-magnification lateral views of *xlurp::GFP* st. 48  $Tail^-$  (n) and  $SC^-$  (o–q) embryos after whole-mount immunofluorescence with acetylated alpha-tubulin (Tub, red), showing the myeloid cells ( $GFP^+$ , green), the neural network (Tub+, red), and the co-location for immune cells and nerves (nuclei are blue after DAPI staining in N). Yellow arrows in n indicate accumulation of immune cells at the bud or amputation plane. Orange arrows in o–q indicate the same point on the three images, noting an aberrant sprouted neural network (red) but without parallel ectopic pattern for macrophages (green; as detected in  $BR^-$  animals, compare to Fig. 4m–o). All: Rostral is left, dorsal is up; scale bar = 250  $\mu m$ .

**Supplementary Figure S4. Gene networks and cell processes unique to infection in presence or absence of a brain during development.**

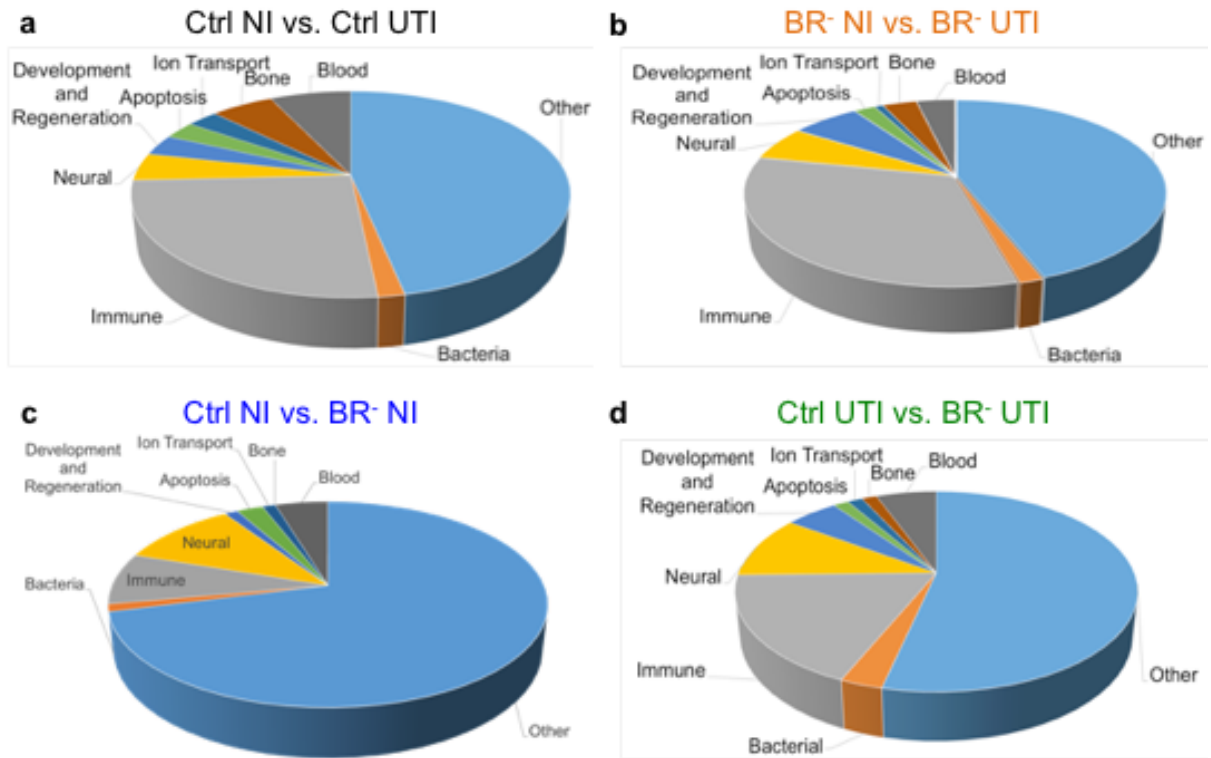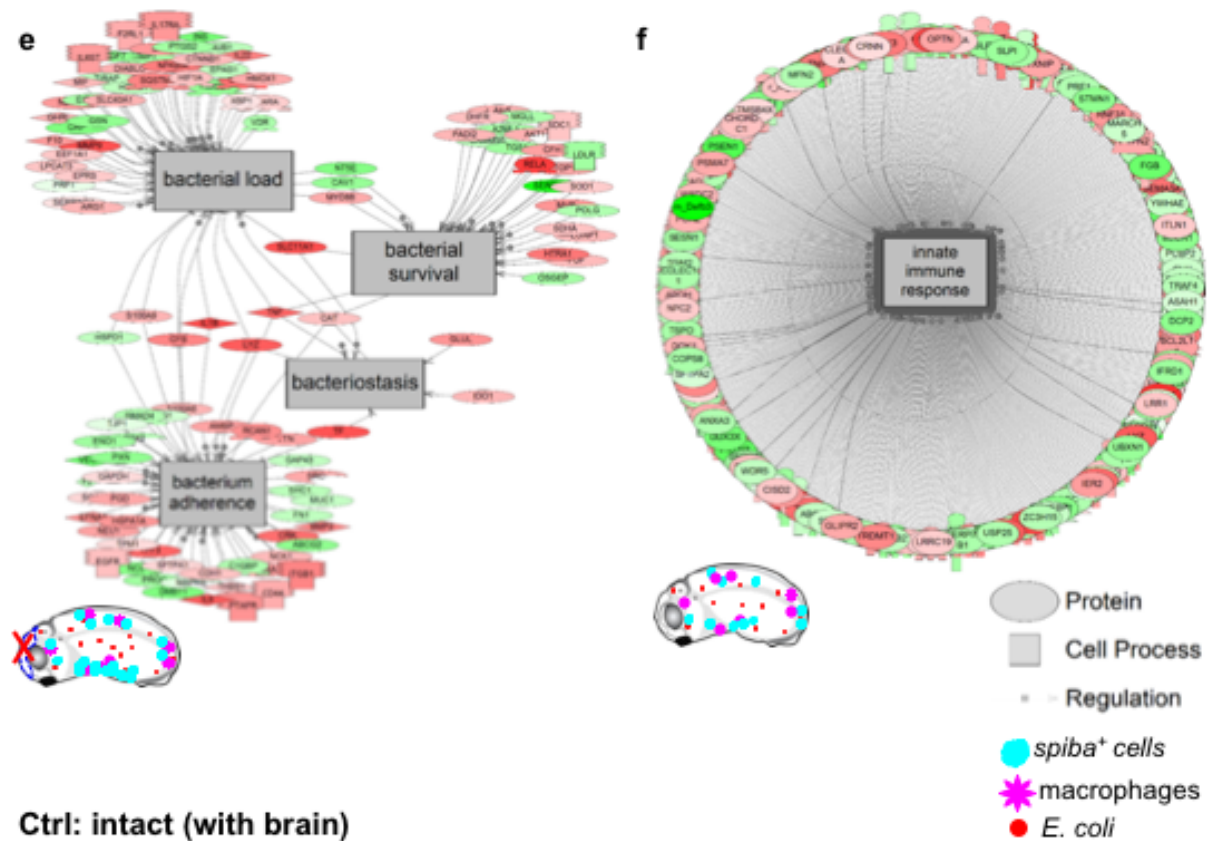

**Ctrl: intact (with brain)**  
**BR<sup>-</sup>: brainless (without brain)**  
**NI: un-infected**  
**UTI: infected with *E. coli***

**a–d.** Pie chart of the functional classification of the pathways exclusively regulated after infection in Control animals (a), after infection in BR<sup>-</sup> animals (b), after brain removal without infection (c), and between infected Ctrl and infected BR<sup>-</sup> embryos (d). **e.** Up-regulation of bacteria-related genes induced by infection in brainless animals. These networks were up-regulated by 20%. **f.** Innate immune response after infection in intact (or developed with a brain) animals. This pathway responds 11% less in presence of a brain than it does in absence of a brain (see Fig. 6c). Green = down gene, Red = up gene. Complete data are presented in Supplementary Data 1. All measured genes found in a pathway are located in Supplementary Data 2.



**Supplementary Figure S5. Gene networks and cell processes unique to infection in presence of brain**

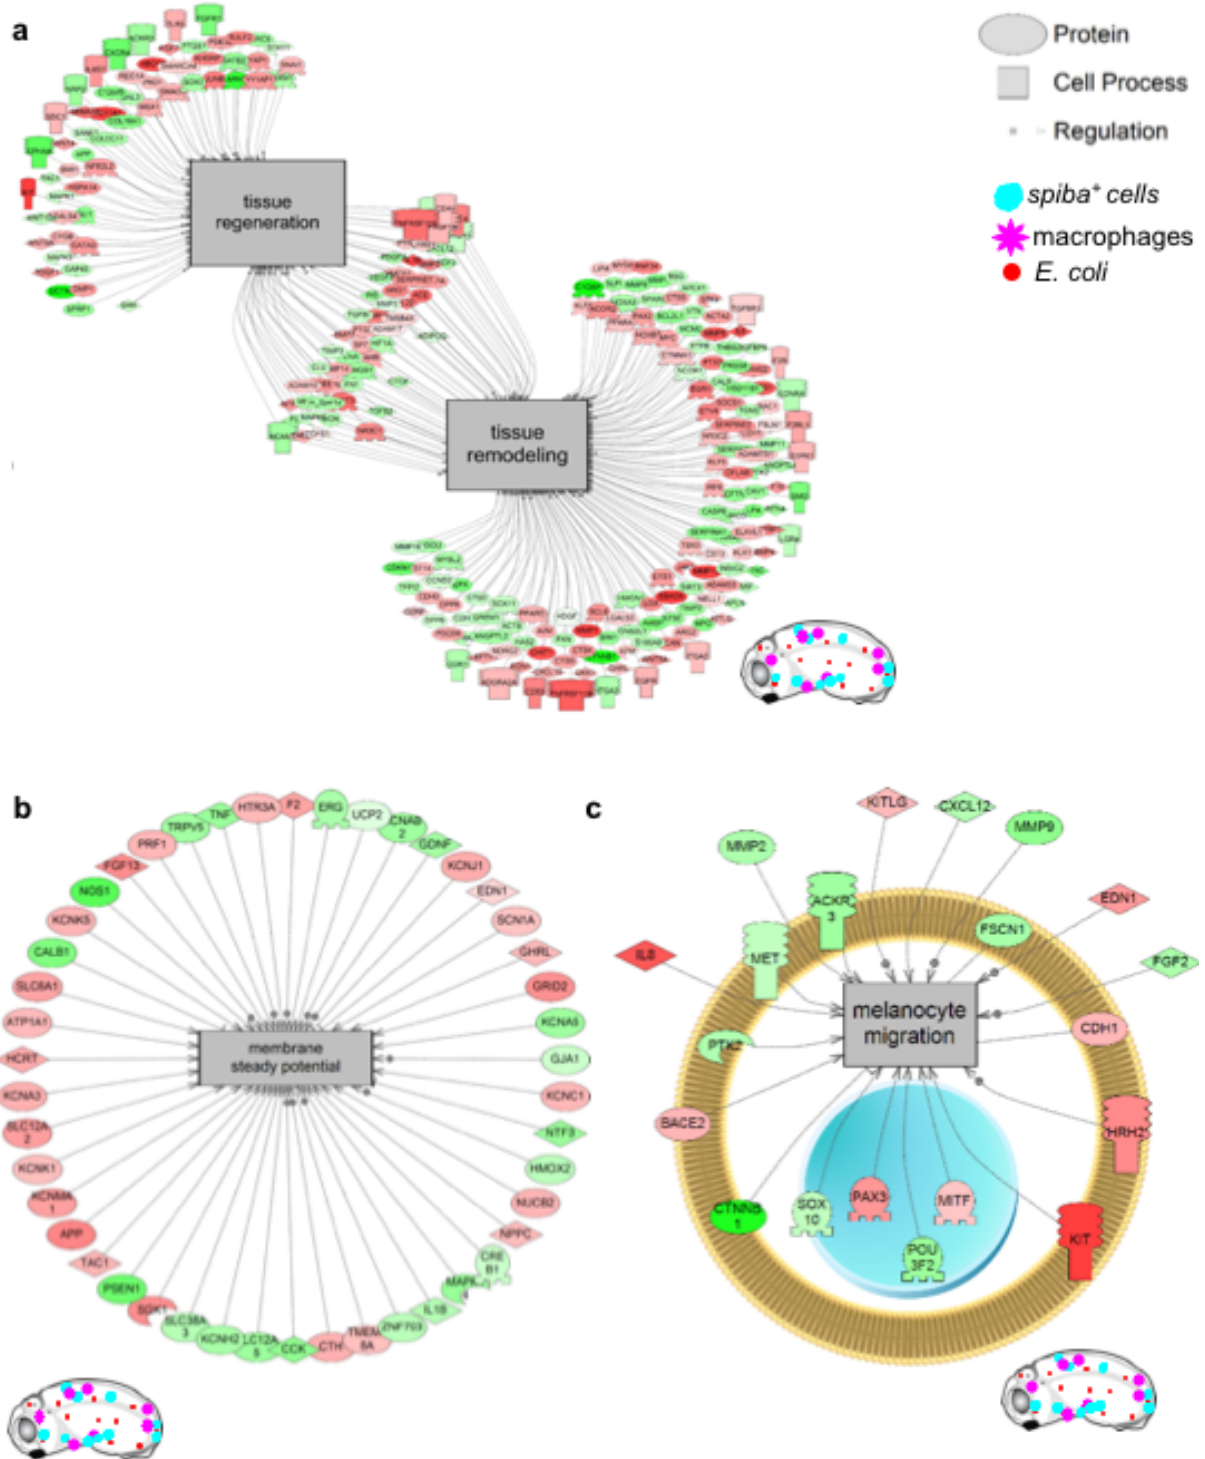

**a.** Considering the role of the brain on macrophages, which in turn are required for regeneration<sup>1</sup>, we analyzed transcriptional sub-networks related to regeneration. Gene networks related to tissue regeneration/remodeling were exclusively regulated in intact animals (developing with brain) with presence of bacteria, suggesting a relationship

between brain, bacteria, and regeneration. **b.** Membrane-Potential related genes. Likewise, genes related to membrane potential are exclusively up regulated by 12%, in the presence of brain, confirming our previous results on connection between electrical signaling from the brain and slow electrical flows in the long-distance somatic tissue<sup>2,3</sup>. **c.** Melanocyte-migration related genes are suppressed (12%) by infection in presence of a brain. Conversely, in absence of brain, this pathway is not affected. Green = down gene, Red = up gene. Complete data are presented in Supplementary Data 1. All measured genes found in a pathway are located in Supplementary Data 2.

## Supplementary Figure S6. Quantitative LC/MS/MS Analysis of Dopamine (DA) in Control (Ctrl) and Brainless (BR<sup>-</sup>) Xenopus embryos

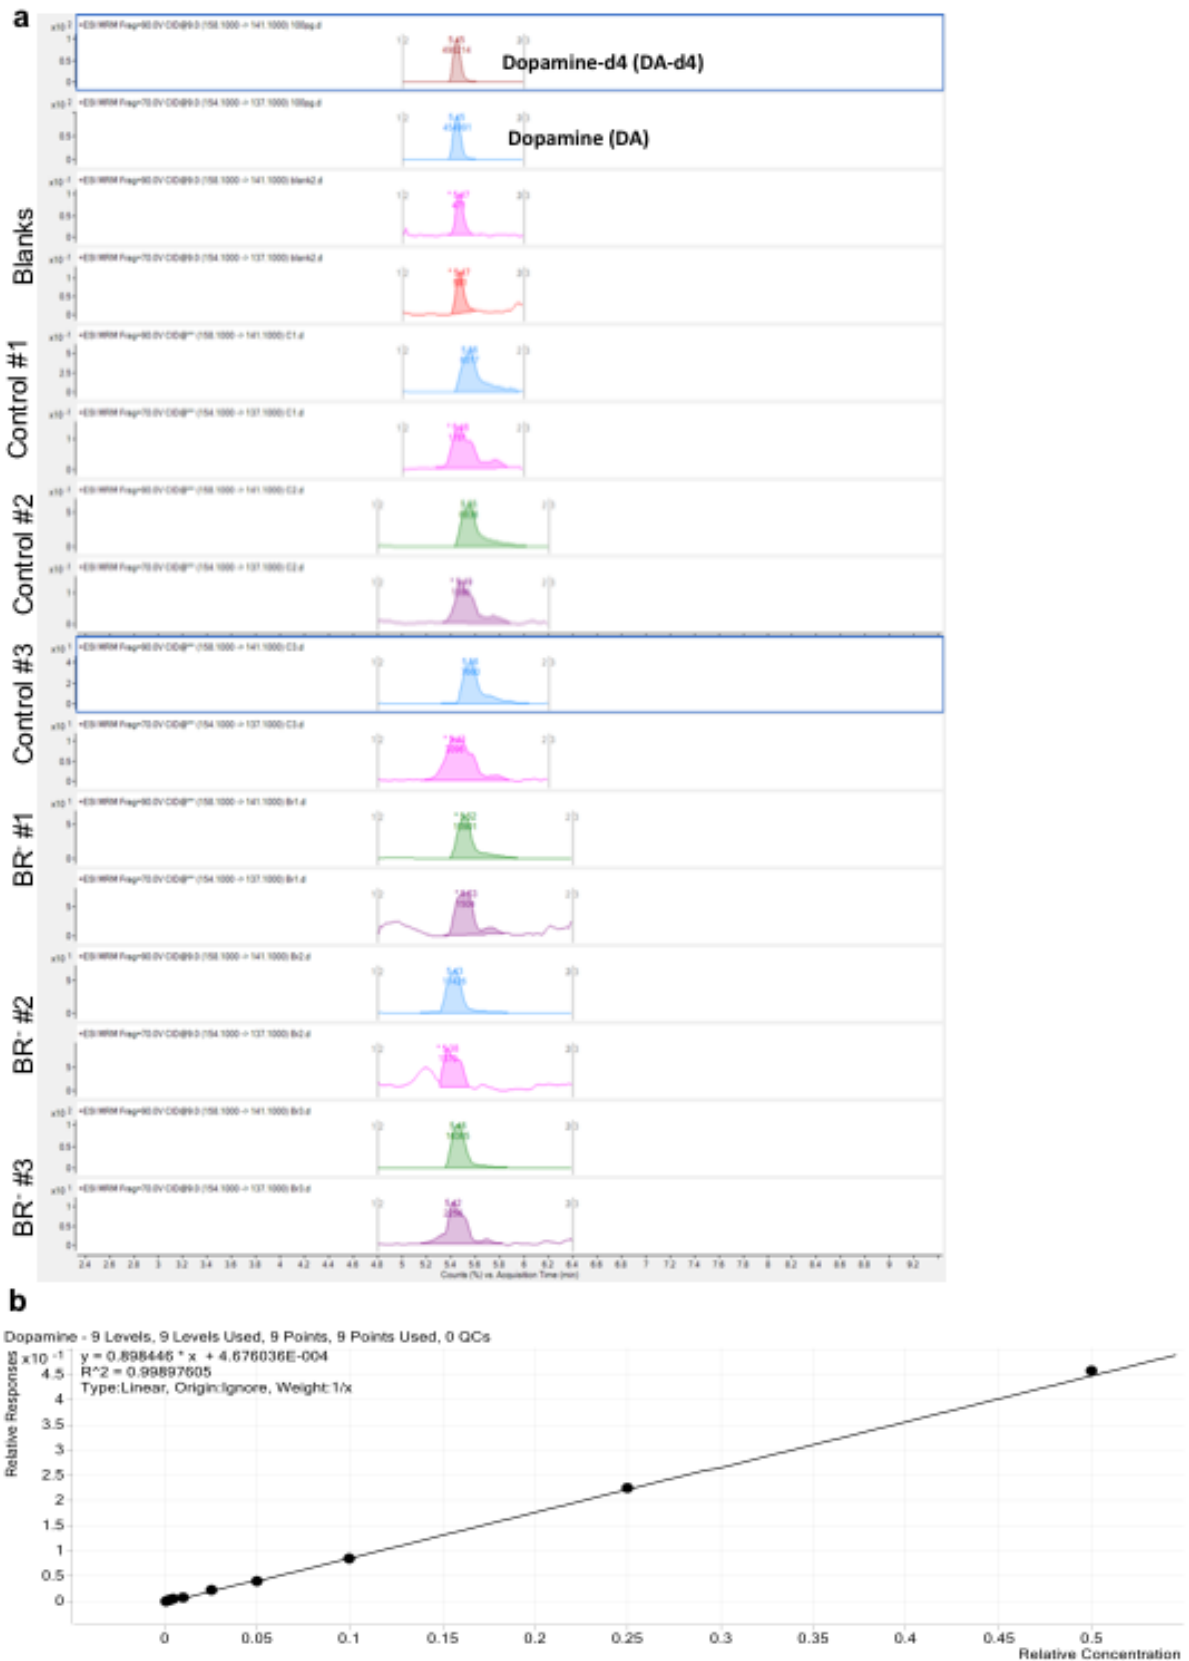

**a.** Chromatogram of DA, its metabolite DA-d4 and labelled versions from whole-mount embryos homogenate. **b.** Standard curve used for DA quantification,  $r^2=0.99897605$ . X-axis is concentration ( $\mu\text{M}$ ) and Y-axis is for relative response of DA corrected by its internal standard (DA-d4).

## Supplementary Tables

**Supplementary Table S1.** Longitudinal assay of survival rates after infection, from stage 25 (surgery) to stage 48. Data indicate the % of survival (as mean  $\pm$  SD) per each stage and group

|          | Control (Ctrl)    | Brainless (BR <sup>-</sup> ) | Spinal Cord Resection (SC <sup>-</sup> ) | Tail amputation (Tail <sup>-</sup> ) |
|----------|-------------------|------------------------------|------------------------------------------|--------------------------------------|
| st.25    | 100.00 $\pm$ 0.00 | 100.00 $\pm$ 0.00            | 100.00 $\pm$ 0.00                        | 100.00 $\pm$ 0.00                    |
| st.26-27 | 100.00 $\pm$ 0.00 | 100.00 $\pm$ 0.00            | 100.00 $\pm$ 0.00                        | 100.00 $\pm$ 0.00                    |
| st.30    | 97.07 $\pm$ 5.08  | 86.67 $\pm$ 5.77             | 88.83 $\pm$ 1.26                         | 100.00 $\pm$ 0.00                    |
| st.35    | 83.70 $\pm$ 13.43 | 54.43 $\pm$ 12.20            | 71.07 $\pm$ 7.46                         | 90.70 $\pm$ 4.69                     |
| st.40    | 67.60 $\pm$ 23.20 | 19.33 $\pm$ 7.02             | 62.33 $\pm$ 17.80                        | 86.93 $\pm$ 5.25                     |
| st.42    | 62.70 $\pm$ 28.58 | 15.07 $\pm$ 9.36             | 61.60 $\pm$ 18.11                        | 86.93 $\pm$ 5.25                     |
| st.48    | 61.60 $\pm$ 28.91 | 11.17 $\pm$ 11.79            | 59.87 $\pm$ 19.50                        | 86.07 $\pm$ 6.14                     |

**Supplementary Table S2.** The top differentially expressed genes that change in response to infection in the absence of a brain. Genes depicted are those that show greater than log<sub>2</sub> = 2 fold change following a FDR correction (Q-value). The expression patterns of all transcripts detected with RNA-seq can be found in Supplementary Data 1

| Cuffmerge Gene ID | Gene Symbol  | Gene Name                                     | log <sub>2</sub> (fold_change) | P_value | Q_value |
|-------------------|--------------|-----------------------------------------------|--------------------------------|---------|---------|
| XLOC_010272       | LOC108710811 | uncharacterized                               | -5.23                          | 0.00005 | 0.010   |
| XLOC_018210       | epha4        | epha4                                         | -4.61                          | 0.0004  | 0.049   |
| XLOC_035252       | LOC108704891 | actin, cytoplasmic 1-like                     | -3.16                          | 0.00005 | 0.010   |
| XLOC_003727       | LOC108706479 | PC-esterase domain-containing protein 1A-like | -2.33                          | 0.00005 | 0.010   |
| XLOC_022822       | LOC108696180 | myoferlin                                     | -2.27                          | 0.00005 | 0.010   |
| XLOC_035987       | LOC108705532 | uncharacterized                               | -2.27                          | 0.00005 | 0.010   |
| XLOC_002807       | LOC108706524 | hepatocyte growth factor activator-like       | -2.22                          | 0.00015 | 0.024   |
| XLOC_023974       | cbl          | Cbl proto-oncogene                            | -2.10                          | 0.00005 | 0.010   |
| XLOC_023102       | LOC108696498 | beta,beta-carotene 9',10'-oxygenase-like      | -2.08                          | 0.00005 | 0.010   |
| XLOC_014733       | LOC108714320 | terminal uridylyl transferase 4 L homeolog    | -2.06                          | 0.00005 | 0.010   |
| XLOC_031018       | LOC108701205 | axin-2-like                                   | -2.01                          | 0.00005 | 0.010   |
| XLOC_017228       | tp63         | tumor protein p63                             | 2.02                           | 0.00025 | 0.035   |
| XLOC_015623       | LOC108715642 | syntaxin 6 S homeolog                         | 2.04                           | 0.00025 | 0.035   |
| XLOC_032296       | LOC108702419 | hemoglobin subunit alpha-3-like               | 2.12                           | 0.00035 | 0.045   |

|             |              |                                                          |      |         |       |
|-------------|--------------|----------------------------------------------------------|------|---------|-------|
| XLOC_025052 | LOC108697171 | tumor necrosis factor receptor superfamily member 6-like | 2.16 | 0.0003  | 0.040 |
| XLOC_006012 | fam64a       | family with sequence similarity 64 member A              | 2.27 | 0.00005 | 0.010 |
| XLOC_033932 | hist1h4a     | histone cluster 1 H4 family member a                     | 2.36 | 0.00005 | 0.010 |
| XLOC_017594 | LOC108716413 | potassium-transporting ATPase alpha chain 2-like         | 2.64 | 0.00005 | 0.010 |
| XLOC_009716 | LOC108711653 | BCL2 associated athanogene 4 L homeolog                  | 2.80 | 0.00005 | 0.010 |
| XLOC_005467 | LOC108708616 | transmembrane serine protease 12 L homeolog              | 2.85 | 0.00005 | 0.010 |
| XLOC_011725 | ogdh         | oxoglutarate dehydrogenase                               | 3.57 | 0.00005 | 0.010 |
| XLOC_019228 | LOC108717383 | xanthine dehydrogenase/oxidase-like                      | 3.62 | 0.00005 | 0.010 |
| XLOC_036434 | LOC108705956 | uncharacterized                                          | 4.09 | 0.00005 | 0.010 |

**Supplementary Table S3. Number of raw and processed reads for samples**

| Sample_Name | Raw Reads | Processed Reads | of high quality reads retained |
|-------------|-----------|-----------------|--------------------------------|
| 1205        | 16423892  | 16325882        | 99.4032                        |
| 1206        | 19260926  | 19164350        | 99.4985                        |
| 1207        | 15505149  | 15421306        | 99.4592                        |
| 1208        | 12900090  | 12828083        | 99.4418                        |
| 1209        | 15980771  | 15902462        | 99.5099                        |
| 1210        | 16742596  | 16667328        | 99.5504                        |
| 1211        | 16454591  | 16370240        | 99.4873                        |
| 1212        | 17797100  | 17704942        | 99.4821                        |

**Supplementary Table S4. Alignment statistics to the reference genome**

| Sample_Name | % Aligned |
|-------------|-----------|
| 1205        | 85.16     |
| 1206        | 85.23     |
| 1207        | 82.70     |
| 1208        | 83.86     |
| 1209        | 84.82     |
| 1210        | 87.05     |
| 1211        | 86.77     |
| 1212        | 84.31     |

**Supplementary Table S5. Number of expressed transcripts**

| Sample_Name | Transcript Expressed* | Transcript with > 1 FPKM | Genes Expressed** |
|-------------|-----------------------|--------------------------|-------------------|
| 1205        | 52581                 | 22768                    | 29366             |
| 1206        | 52921                 | 22800                    | 29733             |
| 1207        | 52359                 | 22297                    | 29265             |
| 1208        | 51637                 | 22282                    | 28966             |
| 1209        | 52108                 | 22167                    | 29108             |
| 1210        | 52469                 | 22109                    | 29322             |
| 1211        | 52850                 | 22639                    | 29665             |
| 1212        | 53010                 | 22786                    | 29770             |

\* Transcripts with non-zero FPKM values \*\* Genes with non-zero FPKM values



**Supplementary Table S6.** The top differentially expressed genes in an intact control embryo after infection. Genes depicted are those that show greater than  $\log_2 = 3$  fold change following a FDR correction (Q-value). The expression patterns of all transcripts detected with RNAseq can be found in Supplementary Data 1.

| Cuffmerge Gene ID | Gene Symbol  | Gene Name                                                                                      | log2 (fold_change) | P_value | Q_value |
|-------------------|--------------|------------------------------------------------------------------------------------------------|--------------------|---------|---------|
| XLOC_022 556      | LOC108695443 | WASH complex subunit 5 S homeolog                                                              | -3.95              | 0.0001  | 0.008   |
| XLOC_030 217      | hba2         | hemoglobin subunit alpha 2 L homeolog                                                          | -3.93              | 0.00005 | 0.004   |
| XLOC_032 296      | LOC108702419 | hemoglobin subunit alpha-3-like                                                                | -3.59              | 0.00005 | 0.004   |
| XLOC_031 336      | hbe1         | hemoglobin subunit epsilon 1 L homeolog                                                        | -3.35              | 0.00005 | 0.004   |
| XLOC_001 932      | prtn3        | proteinase 3 L homeolog                                                                        | -3.33              | 0.00035 | 0.023   |
| XLOC_031 167      | LOC108701350 | cordou-bleu protein-like 1                                                                     | -3.06              | 0.00005 | 0.004   |
| XLOC_033 969      | tnfrsf12a    | TNF receptor superfamily member 12A                                                            | 3.15               | 0.00005 | 0.004   |
| XLOC_036 151      | LOC108705686 | uncharacterized                                                                                | 3.17               | 0.00005 | 0.004   |
| XLOC_028 735      | LOC108699853 | metalloproteinase inhibitor 1-like                                                             | 3.18               | 0.00005 | 0.004   |
| XLOC_021 351      | LOC108719391 | tumor necrosis factor receptor superfamily member 11b L homeolog                               | 3.21               | 0.0004  | 0.025   |
| XLOC_023 763      | LOC108696179 | protocadherin-8-like                                                                           | 3.22               | 0.00035 | 0.023   |
| XLOC_027 819      | MGC84886     | nuclear factor of kappa light polypeptide gene enhancer in B-cells inhibitor, alpha S homeolog | 3.26               | 0.00005 | 0.004   |
| XLOC_033 289      | LOC108703231 | NADPH oxidase organizer 1 S homeolog                                                           | 3.27               | 0.0006  | 0.034   |
| XLOC_008 408      | f7           | coagulation factor VII                                                                         | 3.27               | 0.00005 | 0.004   |
| XLOC_004 011      | LOC108706768 | growth-regulated alpha protein-like                                                            | 3.28               | 0.00085 | 0.045   |
| XLOC_001 507      | tnip2        | TNFAIP3 interacting protein 2                                                                  | 3.28               | 0.00005 | 0.004   |
| XLOC_000 907      | LOC108715061 | KH and NYN domain containing L homeolog                                                        | 3.29               | 0.00005 | 0.004   |
| XLOC_010 979      | LOC108711587 | caspase-7-like                                                                                 | 3.30               | 0.00005 | 0.004   |
| XLOC_015 074      | slc26a6      | solute carrier family 26, member 6                                                             | 3.34               | 0.0001  | 0.008   |
| XLOC_008 154      | LOC108709471 | E74 like ETS transcription factor 3 S homeolog                                                 | 3.49               | 0.00005 | 0.004   |

|             |              |                                                                 |      |         |       |
|-------------|--------------|-----------------------------------------------------------------|------|---------|-------|
| XLOC_016075 | rag2         | recombination activating gene 2                                 | 3.57 | 0.00005 | 0.004 |
| XLOC_028037 | stom         | stomatin                                                        | 3.57 | 0.0004  | 0.025 |
| XLOC_022421 | cebpd        | CCAAT/enhancer binding protein (C/EBP), delta                   | 3.63 | 0.00005 | 0.004 |
| XLOC_034120 | LOC108703954 | interferon-induced very large GTPase 1-like                     | 3.74 | 0.00005 | 0.004 |
| XLOC_029952 | LOC108701277 | uncharacterized                                                 | 3.84 | 0.00005 | 0.004 |
| XLOC_034935 | LOC108704637 | uncharacterized                                                 | 3.90 | 0.00005 | 0.004 |
| XLOC_003894 | LOC108706649 | neuropeptide Y receptor type 2-like                             | 3.93 | 0.00005 | 0.004 |
| XLOC_008262 | LOC108709575 | zinc finger CCCH-type containing 12A S homeolog                 | 3.93 | 0.00005 | 0.004 |
| XLOC_021242 | LOC108719274 | cytochrome P450 family 7 subfamily B member 1 L homeolog        | 4.11 | 0.00005 | 0.004 |
| XLOC_026924 | LOC108698357 | ES1 protein homolog, mitochondrial-like                         | 4.17 | 0.00005 | 0.004 |
| XLOC_007356 | LOC108709667 | NF-kappa-B inhibitor zeta-like                                  | 4.19 | 0.00005 | 0.004 |
| XLOC_034448 | LOC108704305 | tumor necrosis factor receptor superfamily member 12A-like      | 4.26 | 0.00025 | 0.017 |
| XLOC_009815 | LOC108711697 | intercellular adhesion molecule 5-like                          | 4.36 | 0.00005 | 0.004 |
| XLOC_017373 | LOC108717116 | ST6 beta-galactosamide alpha-2,6-sialyltransferase 1 L homeolog | 4.39 | 0.00005 | 0.004 |
| XLOC_032162 | LOC108702967 | TRAF family member associated NFKB activator                    | 4.40 | 0.00005 | 0.004 |
| XLOC_026023 | LOC108698598 | cdc42 effector protein 2-like                                   | 4.52 | 0.00005 | 0.004 |
| XLOC_022542 | tnfrsf11b    | TNF receptor superfamily member 11b                             | 4.56 | 0.0002  | 0.014 |
| XLOC_027554 | LOC108699327 | receptor-interacting serine/threonine-protein kinase 3-like     | 4.65 | 0.00005 | 0.004 |
| XLOC_013524 | LOC108714143 | mixed lineage kinase domain-like L homeolog                     | 4.66 | 0.00005 | 0.004 |
| XLOC_008663 | mmp8         | matrix metalloproteinase 8                                      | 4.79 | 0.00005 | 0.004 |
| XLOC_001803 | LOC108711085 | interleukin-8-like                                              | 4.82 | 0.00015 | 0.011 |
| XLOC_024328 | LOC108696828 | hepcidin antimicrobial peptide 2 L homeolog                     | 4.84 | 0.00005 | 0.004 |
| XLOC_019037 | tf           | transferrin                                                     | 4.85 | 0.00005 | 0.004 |
| XLOC_036131 | LOC108705666 | yrdC domain-containing protein, mitochondrial-like              | 4.87 | 0.0002  | 0.014 |

|             |              |                                                                       |      |         |       |
|-------------|--------------|-----------------------------------------------------------------------|------|---------|-------|
| XLOC_032660 | ada          | adenosine deaminase                                                   | 4.90 | 0.00005 | 0.004 |
| XLOC_001804 | cxcl8        | C-X-C motif chemokine ligand 8                                        | 5.41 | 0.00005 | 0.004 |
| XLOC_034817 | LOC108704510 | uncharacterized                                                       | 5.55 | 0.00005 | 0.004 |
| XLOC_025787 | LOC100490918 | probable alpha-ketoglutarate-dependent hypophosphite dioxygenase-like | 5.69 | 0.0004  | 0.025 |
| XLOC_019410 | tnfaip3      | TNF alpha induced protein 3                                           | 5.80 | 0.00005 | 0.004 |
| XLOC_030559 | LOC108700769 | colony stimulating factor 3 L homeolog                                | 6.35 | 0.00065 | 0.037 |
| XLOC_026914 | LOC108698345 | cis-aconitate decarboxylase-like                                      | 7.14 | 0.0002  | 0.014 |
| XLOC_014278 | tlrs5        | soluble toll-like receptor 5                                          | 7.31 | 0.00005 | 0.004 |
| XLOC_027190 | olfm4        | olfactomedin 4                                                        | 7.49 | 0.00005 | 0.004 |
| XLOC_006731 | mmp1         | matrix metalloproteinase 1                                            | 7.55 | 0.00005 | 0.004 |
| XLOC_026210 | LOC108698790 | tumor necrosis factor alpha-induced protein 2-like                    | 8.71 | 0.00005 | 0.004 |

**Supplementary Table S7.** The top differentially expressed genes in brainless animals following infection. Genes depicted are those that show greater than  $\log_2 = 3$ -fold change following a FDR correction (Q-value). The expression patterns of all transcripts detected with RNAseq can be found in Supplementary Data 1.

| Cuffmerge Gene ID | Gene Symbol  | Gene Name                                          | $\log_2$ (fold_change) | P_value | Q_value |
|-------------------|--------------|----------------------------------------------------|------------------------|---------|---------|
| XLOC_018210       | epha4        | Eph receptor A4                                    | -4.10                  | 0.00005 | 0.003   |
| XLOC_010272       | LOC108710811 | uncharacterized                                    | -3.53                  | 0.00005 | 0.003   |
| XLOC_006014       | LOC108708048 | uncharacterized protein C6orf132-like              | -3.15                  | 0.00005 | 0.003   |
| XLOC_010979       | LOC108711587 | caspase-7-like                                     | 3.02                   | 0.00015 | 0.009   |
| XLOC_029907       | parp14       | poly(ADP-ribose) polymerase family member 14       | 3.04                   | 0.00005 | 0.003   |
| XLOC_011758       | anxa4        | annexin A4                                         | 3.04                   | 0.00005 | 0.003   |
| XLOC_023666       | LOC108696094 | HtrA serine peptidase 1 L homeolog                 | 3.06                   | 0.00015 | 0.009   |
| XLOC_023319       | napasa       | napsin A aspartic peptidase                        | 3.09                   | 0.00005 | 0.003   |
| XLOC_003641       | prlr         | prolactin receptor                                 | 3.11                   | 0.00005 | 0.003   |
| XLOC_029339       | stat3        | signal transducer and activator of transcription 3 | 3.15                   | 0.0013  | 0.050   |
| XLOC_026741       | slc2a6       | solute carrier family 2 member 6                   | 3.19                   | 0.00005 | 0.003   |
| XLOC_029952       | LOC108701277 | uncharacterized LOC108701277                       | 3.24                   | 0.00005 | 0.003   |
| XLOC_025591       | timp-1       | TIMP metalloproteinase inhibitor 1                 | 3.24                   | 0.00005 | 0.003   |

|             |              |                                                                                                |      |         |       |
|-------------|--------------|------------------------------------------------------------------------------------------------|------|---------|-------|
| XLOC_036131 | LOC108705666 | yrnC domain-containing protein, mitochondrial-like                                             | 3.25 | 0.00005 | 0.003 |
| XLOC_028037 | stom         | stomatin                                                                                       | 3.28 | 0.00005 | 0.003 |
| XLOC_036966 | irg1         | Infection Response Gene                                                                        | 3.28 | 0.00005 | 0.003 |
| XLOC_015074 | slc26a6      | solute carrier family 26, member 6                                                             | 3.32 | 0.00005 | 0.003 |
| XLOC_005365 | LOC108708498 | immunoresponsive 1 homolog                                                                     | 3.34 | 0.00005 | 0.024 |
| XLOC_028328 | cfb          | complement factor B                                                                            | 3.34 | 0.00005 | 0.003 |
| XLOC_034817 | LOC108704510 | uncharacterized                                                                                | 3.40 | 0.00005 | 0.003 |
| XLOC_003894 | LOC108706649 | neuropeptide Y receptor type 2-like                                                            | 3.41 | 0.00005 | 0.003 |
| XLOC_008663 | mmp8         | matrix metalloproteinase 8                                                                     | 3.45 | 0.00005 | 0.003 |
| XLOC_032660 | ada          | adenosine deaminase                                                                            | 3.46 | 0.00005 | 0.003 |
| XLOC_022542 | tnfrsf11b    | TNF receptor superfamily member 11b                                                            | 3.47 | 0.00005 | 0.003 |
| XLOC_008262 | LOC108709575 | zinc finger CCCH-type containing 12A S homeolog                                                | 3.56 | 0.00005 | 0.003 |
| XLOC_021242 | LOC108719274 | cytochrome P450 family 7 subfamily B member 1 L homeolog                                       | 3.59 | 0.00005 | 0.003 |
| XLOC_028735 | LOC108699853 | metalloproteinase inhibitor 1-like                                                             | 3.60 | 0.00005 | 0.003 |
| XLOC_034230 | LOC108704035 | ninjurin-1-like                                                                                | 3.66 | 0.00055 | 0.025 |
| XLOC_027819 | MGC84886     | nuclear factor of kappa light polypeptide gene enhancer in B-cells inhibitor, alpha S homeolog | 3.71 | 0.00005 | 0.003 |
| XLOC_001780 | grid2        | glutamate receptor, ionotropic, delta 2                                                        | 3.80 | 0.00015 | 0.009 |
| XLOC_024328 | LOC108696828 | hepcidin antimicrobial peptide 2 L homeolog                                                    | 3.86 | 0.00005 | 0.003 |
| XLOC_003778 | LOC733361    | TNFAIP3 interacting protein 2 S homeolog                                                       | 3.97 | 0.00005 | 0.003 |
| XLOC_020434 | ttr          | transthyretin                                                                                  | 4.01 | 0.00005 | 0.003 |
| XLOC_030439 | rnf40        | ring finger protein 40, E3 ubiquitin protein ligase L homeolog                                 | 4.01 | 0.00005 | 0.003 |
| XLOC_017373 | LOC108717116 | ST6 beta-galactosamide alpha-2,6-sialyltransferase 1 L homeolog                                | 4.03 | 0.00005 | 0.003 |
| XLOC_034935 | LOC108704637 | uncharacterized                                                                                | 4.05 | 0.00005 | 0.003 |
| XLOC_026023 | LOC108698598 | cdc42 effector protein 2-like                                                                  | 4.08 | 0.00005 | 0.003 |
| XLOC_004011 | LOC108706768 | growth-regulated alpha protein-like                                                            | 4.08 | 0.00075 | 0.032 |
| XLOC_013524 | LOC108714143 | mixed lineage kinase domain-like L homeolog                                                    | 4.27 | 0.00005 | 0.003 |
| XLOC_010282 | tnip1        | TNFAIP3 interacting protein 1                                                                  | 4.28 | 0.00005 | 0.003 |
| XLOC_032162 | LOC108702967 | TRAF family member associated NFKB activator S homeolog                                        | 4.36 | 0.00005 | 0.003 |
| XLOC_009635 | LOC108711579 | uncharacterized                                                                                | 4.36 | 0.00015 | 0.009 |
| XLOC_026916 | LOC108698348 | ES1 protein homolog, mitochondrial-like                                                        | 4.41 | 0.00005 | 0.003 |
| XLOC_033289 | LOC108703231 | NADPH oxidase organizer 1 S homeolog                                                           | 4.42 | 0.0004  | 0.020 |
| XLOC_025426 | cnfn-b       | cornifelin, gene 1 S homeolog                                                                  | 4.53 | 0.00095 | 0.039 |
| XLOC_026914 | LOC108698345 | cis-aconitate decarboxylase-like                                                               | 4.67 | 0.00005 | 0.003 |
| XLOC_001804 | cxcl8        | C-X-C motif chemokine ligand 8                                                                 | 4.97 | 0.00005 | 0.003 |
| XLOC_009815 | LOC108711697 | intercellular adhesion molecule 5-like                                                         | 4.99 | 0.00005 | 0.003 |

|             |                  |                                                                         |      |         |       |
|-------------|------------------|-------------------------------------------------------------------------|------|---------|-------|
| XLOC_013785 | LOC1087135<br>47 | vascular cell adhesion molecule 1 L<br>homeolog                         | 5.26 | 0.00065 | 0.029 |
| XLOC_019037 | tf               | transferrin                                                             | 5.87 | 0.00005 | 0.003 |
| XLOC_019410 | tnfaip3          | TNF alpha induced protein 3                                             | 5.92 | 0.00005 | 0.003 |
| XLOC_023188 | LOC1086965<br>92 | tumor necrosis factor receptor<br>superfamily member 9 L homeolog       | 6.03 | 0.00005 | 0.003 |
| XLOC_004012 | LOC1087067<br>69 | interleukin-8-like                                                      | 6.31 | 0.00005 | 0.003 |
| XLOC_027553 | ripk3            | receptor-interacting serine-threonine<br>kinase 3                       | 6.66 | 0.00045 | 0.022 |
| XLOC_025785 | LOC1086983<br>50 | probable alpha-ketoglutarate-<br>dependent hypophosphite<br>dioxygenase | 6.85 | 0.00005 | 0.003 |
| XLOC_027190 | olfm4            | olfactomedin 4                                                          | 6.89 | 0.00005 | 0.003 |
| XLOC_014278 | tlrs5            | soluble toll-like receptor 5                                            | 7.51 | 0.00005 | 0.003 |
| XLOC_026210 | LOC1086987<br>90 | tumor necrosis factor alpha-induced<br>protein 2-like                   | 7.95 | 0.00005 | 0.003 |
| XLOC_006731 | mmp1             | matrix metalloproteinase 1                                              | 8.39 | 0.0001  | 0.006 |

**Supplementary Table 8.** The top differentially expressed genes that change with brain removal (in absence of infection). Genes depicted are those that show greater than log2=2-fold change following a FDR correction (Q-value). The expression patterns of all transcripts detected with RNAseq can be found in Supplementary Data 1. Common genes responsive to brain removal and tail removal in *Xenopus*<sup>4</sup> has been excluded for this analysis.

| Cuffmerge Gene ID | Gene Symbol  | Gene Name                                                      | log2(fold_change) | P_value | Q_value |
|-------------------|--------------|----------------------------------------------------------------|-------------------|---------|---------|
| XLOC_022556       | LOC108695443 | WASH complex subunit 5 S homeolog                              | -4.10             | 0.00005 | 0.016   |
| XLOC_030439       | rnf40-b      | ring finger protein 40, E3 ubiquitin protein ligase L homeolog | -3.98             | 0.0001  | 0.029   |
| XLOC_000096       | LOC108697691 | nuclear receptor binding SET domain protein 2 L homeolog       | -3.33             | 0.00005 | 0.016   |
| XLOC_026931       | LOC108698366 | uncharacterized                                                | -2.82             | 0.00005 | 0.016   |
| XLOC_035252       | LOC108704891 | actin, cytoplasmic 1-like                                      | -2.80             | 0.00005 | 0.016   |
| XLOC_022843       | tbc1d12      | TBC1 domain family member 12 L homeolog                        | -2.60             | 0.00005 | 0.016   |
| XLOC_025638       | LOC108698163 | euchromatic histone-lysine N-methyltransferase 1 L homeolog    | -2.56             | 0.00005 | 0.016   |
| XLOC_011225       | tyk2         | tyrosine kinase 2                                              | -2.37             | 0.00005 | 0.016   |
| XLOC_024032       | LOC108696525 | agrin-like                                                     | -2.23             | 0.00005 | 0.016   |
| XLOC_011552       | akr1c8p      | aldo-keto reductase family 1 member C8                         | -2.14             | 0.00005 | 0.016   |
| XLOC_036933       | LOC108706318 | uncharacterized                                                | 2.03              | 0.00005 | 0.016   |
| XLOC_029735       | LOC108701066 | acyl-CoA synthetase short chain family member 2,               | 2.21              | 0.00005 | 0.016   |

|                        |                          |                                                                                                             |      |         |       |
|------------------------|--------------------------|-------------------------------------------------------------------------------------------------------------|------|---------|-------|
|                        |                          | gene 1 L homeolog                                                                                           |      |         |       |
| XLOC_009229            | LOC108711149             | leiomod-in-2-like                                                                                           | 2.25 | 0.00005 | 0.016 |
| XLOC_021094            | LOC108719134             | neural precursor cell expressed, developmentally down-regulated 9 L homeolog                                | 2.48 | 0.00005 | 0.040 |
| XLOC_006014            | LOC108708048             | uncharacterized protein C6orf132-like                                                                       | 2.56 | 0.00005 | 0.016 |
| XLOC_027229            | LOC108698676lonrf        | FBJ murine osteosarcoma viral oncogene homolog L homeolog LON peptidase N-terminal domain and ring finger 1 | 2.66 | 0.0001  | 0.016 |
| XLOC_022613XLOC_027229 | add3LOC108698676         | adducin 3FBJ murine osteosarcoma viral oncogene homolog L homeolog                                          | 2.88 | 0.00005 | 0.029 |
| XLOC_017594XLOC_022613 | LOC108716413add3         | potassium-transporting ATPase alpha chain 2-like adducin 3                                                  | 3.02 | 0.00005 | 0.016 |
| XLOC_026918XLOC_017594 | LOC108698346LOC108716413 | cis-aconitate decarboxylase-like potassium-transporting ATPase alpha chain 2-like                           | 3.08 | 0.00005 | 0.016 |
| XLOC_004116XLOC_026918 | LOC108704680LOC108698346 | mucin-22-likecis-aconitate decarboxylase-like                                                               | 3.57 | 0.0001  | 0.016 |
| XLOC_025787XLOC_004116 | LOC100490918LOC108704680 | probable alpha-ketoglutarate-dependent hypophosphite dioxygenase-like mucin-22-like                         | 3.87 | 0.00005 | 0.029 |





## Supplementary Methods

### Supplementary Methods 1: Reads and quality of sequencing

From a total of 131,065,115 (50x1) reads, 130,384,593 high quality adapter free reads were utilized in subsequent analyses. On average 16,298,074 reads were retained for downstream analysis (Supplementary Table S2). For every sample, an average of 99.47% of high-quality data were retained. An average of ~83.86% of processed reads aligned to the *Xenopus* reference genome (Supplementary Table S3). There was an average of 52,491 transcripts expressed across all samples. Transcripts were identified and quantified based on aligned reads. Transcript expression was generated through Cufflinks. Compiled expression profiles at the transcript level, as well as gene level, were represented in the form of an FPKM matrix and the total number of expressed transcripts in all the samples is given in Table S4. Group-wise comparison at the transcript level was performed to identify differentially regulated transcripts between any two of the four conditions. The number of differentially expressed genes (DEGs) was determined after multiple hypothesis correction. The q value (adjusted *P*-value) was set at 0.05 and DEGs were considered to be those transcripts passing this correction (all expression data can be found in Supplementary Data 1 for all comparisons).

### Supplementary Methods 2: LC/MS/MS Method for Dopamine & Dopamine-d4.

#### LC parameters:

Column: Agilent Eclipse XDB-C18 (Agilent Technologies)

Solvent (A) 0.1% Formic acid

Solvent (B) 0.1% Formic acid in acetonitrile

Flow rate: 0.4mLs/min

10uL injection

Standards / samples analyzed in H<sub>2</sub>O

#### Reverse phase gradient:

0.00min @ 2% B

6.00min @ 100% B

7.00min @ 100% B

7.10min @ 2% B

10.0min @ 2% B

Mass Spec parameters (Agilent 6460 Triple-quad LCMS System) (Agilent Technologies)

MRM (multiple reaction monitoring)

| Compound     | Precursor ion | Product ion | Dwell | Frag(V) | CE (V) | polarity |
|--------------|---------------|-------------|-------|---------|--------|----------|
| Dopamine     | 154.1         | 137.1       | 200   | 70      | 9      | positive |
| Dopamine     | 154.1         | 91.1        | 200   | 70      | 25     | positive |
| Dopamine-d4: | 158.1         | 141.1       | 200   | 90      | 9      | positive |
| Dopamine-d4: | 158.1         | 95.1        | 200   | 90      | 29     | positive |

Gas Temp: 350C

Gas flow: 12 L/min

Nebulizer: 35 psi

SheathGasHeater: 400C

SheathGasflow: 12 L/min

Capillary(V): 4000

VCharging: 500

## Supplementary Notes

### **Supplementary Note 1: *Xenopus* Immune System: early 30's vs. late 40's.**

At st. 30, the only immunity present in embryo is driven by innate-immune cells. During the first 12 d post-fertilization (until approx. st. 47, in which differentiated B and T cells emerge in the periphery), the embryo must rely on innate type of myeloid cells or nonlymphocyte leukocytes for defense (reviewed in<sup>5</sup>). The thymus (where T cells differentiate) arises around st. 40 and, by st. 48, the cortex–medulla architecture becomes visible with expression of mature T-cell markers (such as MHC class II, CTX etc). The spleen anlage forms around st. 47 where lymphocytes accumulate by st. 48-49, a time that corresponds to the first detectable Ab response and detection of mature competent B cells (reviewed in<sup>6</sup>). Although our study focusses on myeloid cells, it is clear that the *Xenopus* immune system at early (around stage 30) vs. later stages (from st. 47) is driven by different players and organs<sup>7,8</sup>, and response at stage 48 will be more complex, elaborated in terms of cell differentiation and recruitment. The embryonic anterior blood island, initial source of myeloid cells, is formed at st. 20. At the early st. 30, the myeloid cells present in embryo, 'myelocytes', are still considered primitive or serving as transient innate immune effector cells<sup>9</sup>. At later stages, and subsequent to the establishment of blood circulation, expression of a fluorescence marker under the control of cell type-specific promoters in transgenic animals revealed complex and diverse populations of myeloid cells including granulocytic and monocytic lineages<sup>10</sup> (reviewed in<sup>11</sup>) starting at around st. 40-46.

### **Supplementary Note 2: Summary of the top differentially expressed genes.**

Infection in an intact embryo induced the down-regulation of genes encoding neutrophil elastase (proteinase 3) and cordon-bleu protein-like 1 which is involved in an actin-filament network. Immune- and neural-related genes were highly up regulated in infected intact animals, especially transcripts for colony stimulating factor 3 L homeolog (CSF3), tumor necrosis factor (TNF) receptor-I signaling complex, RAG complex, and protocadherin-8-like gene (Supplementary Table S6). The transcriptional outcome for brainless animals with infection was characterized for the up-regulation of genes related to bacteria metabolism (such as the probable alpha-ketoglutarate-dependent hypophosphite dioxygenase) and immune activity, such as

TNFR signaling, interleukin-8 and the immunoglobulin VCAM-1 (vascular cell adhesion molecule 1L homolog) (Supplementary Table S7). Brain removal (without infection, Table S8, and after subtracting transcripts in common with tail removal) specifically induced high up-regulation of genes related to genome instability and neural development. Some of the common DEGS for unspecific removal of any organ of the body were *fos* or *lonrf1*. Highest DEGs displayed in the response to infection in absence of brain (Ctrl UTI vs. BR<sup>-</sup> UTI; Supplementary Table S2) included down-regulation of transcripts related to tissue injury and repair (such as myoferlin and growth factors), ubiquitination of proteins, RNA uridylation and stability of beta catenin. The most up-regulated genes were related to BAG-4 proteins, cytokine receptors and TNFR pathway.

## Supplementary Data

**Supplementary Data 1.** List of all genes and subnetworks differentially expressed between two conditions.

**Supplementary Data 2.** List of genes and acronyms used in the subnetwork enrichment analysis of the transcriptome for not-infected (NI) and infected (UTI) control and brainless embryos.

**Supplementary Video S1.** Time-lapse movie of a *Xlurp::GFP* embryo at stage 26, showing real-time macrophage behavior. Duration 3h 30 min, 5 fps.

### References for Supplementary Information

- 1 Godwin, J. W., Pinto, A. R. & Rosenthal, N. A. Macrophages are required for adult salamander limb regeneration. *Proceedings of the National Academy of Sciences* **110**, 9415-9420, doi:10.1073/pnas.1300290110 (2013).
- 2 Herrera-Rincon, C., Pai, V. P., Moran, K. M., Lemire, J. M. & Levin, M. The brain is required for normal muscle and nerve patterning during early *Xenopus* development. *Nature communications* **8**, doi:10.1038/s41467-017-00597-2 (2017).
- 3 Pai, V. P., Lemire, J. M., Chen, Y., Lin, G. & Levin, M. Local and long-range endogenous resting potential gradients antagonistically regulate apoptosis and proliferation in the embryonic CNS. *The International journal of developmental biology* **59**, 327-340, doi:10.1387/ijdb.150197ml (2015).
- 4 Chang, J., Baker, J. & Wills, A. Transcriptional dynamics of tail regeneration in *Xenopus tropicalis*. *Genesis (New York, N.Y. : 2000)* **55**, doi:10.1002/dvg.23015 (2017).
- 5 Hansen, J. D. & Zapata, A. G. Lymphocyte development in fish and amphibians. *Immunological reviews* **166**, 199-220 (1998).
- 6 Robert, J. & Ohta, Y. Comparative and developmental study of the immune system in *Xenopus*. *Dev Dyn* **238**, 1249-1270, doi:10.1002/dvdy.21891 (2009).
- 7 Imai, Y. *et al.* Multiple origins of embryonic and tadpole myeloid cells in *Xenopus laevis*. *Cell Tissue Res* **369**, 341-352, doi:10.1007/s00441-017-2601-4 (2017).
- 8 Ciau-Uitz, A., Liu, F. & Patient, R. Genetic control of hematopoietic development in *Xenopus* and zebrafish. *Int J Dev Biol* **54**, 1139-1149, doi:10.1387/ijdb.093055ac (2010).
- 9 Costa, R. M., Soto, X., Chen, Y., Zorn, A. M. & Amaya, E. *spib* is required for primitive myeloid development in *Xenopus*. *Blood* **112**, 2287-2296, doi:10.1182/blood-2008-04-150268 (2008).
- 10 Paredes, R., Ishibashi, S., Borrill, R., Robert, J. & Amaya, E. *Xenopus*: An in vivo model for imaging the inflammatory response following injury and

- bacterial infection. *Dev Biol* **408**, 213-228, doi:10.1016/j.ydbio.2015.03.008 (2015).
- 11 Grayfer, L. & Robert, J. Amphibian macrophage development and antiviral defenses. *Developmental and comparative immunology* **58**, 60-67, doi:10.1016/j.dci.2015.12.008 (2016).
